# Supplementary material for: Properties and Crystal Structure of the Cereibacter sphaeroides Photosynthetic Reaction Center with Double Amino Acid Substitution I(L177)H + F(M197)H
Source: MDPI journal article supplement (doi:10.3390/membranes13020157), 2023-01-26
Supplement: s1 [file s1]

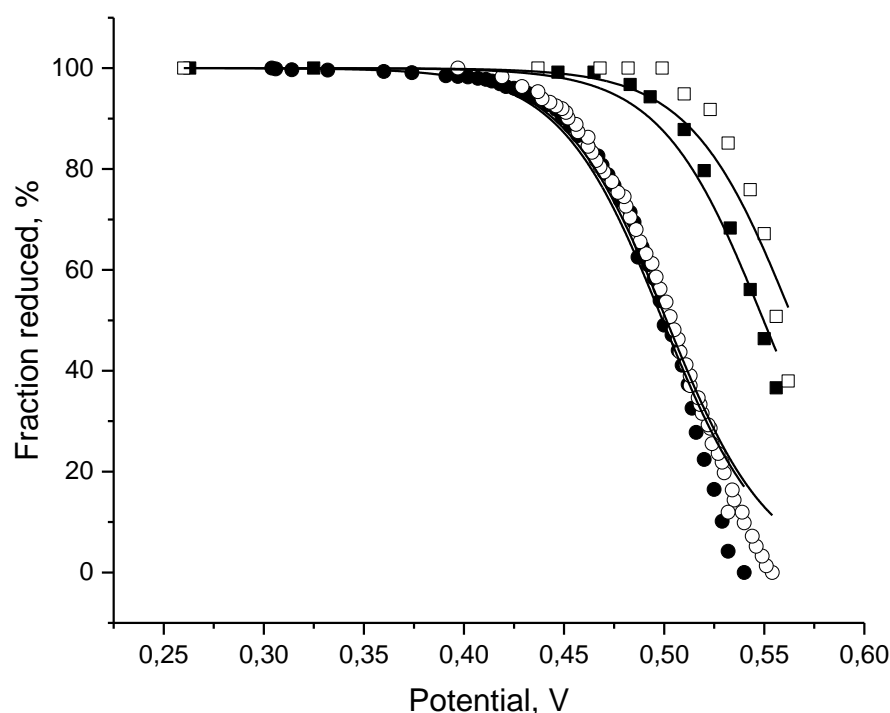

**Figure S1.** Redox titrations of the wild-type (●,○) and the I(L177)H+F(M197)H (■,□) RCs. The extent of reduction of the P dimer was determined by measuring the amplitude of the P Q<sub>y</sub> band (at 865 nm in WT and 854 nm in mutant) simultaneously with monitoring the ambient redox potential. The close symbols represent normalized data from oxidative titrations, and the open symbols represent normalized data from subsequent reductive titrations performed on the same sample. The lines show the fits to the Nernst equation ( $n = 1$ ). According to the data, the values of the P/P<sup>+</sup> midpoint potential for the wild-type and double mutant RCs are approximately  $500 \pm 1$  and  $555 \pm 10$ , respectively.

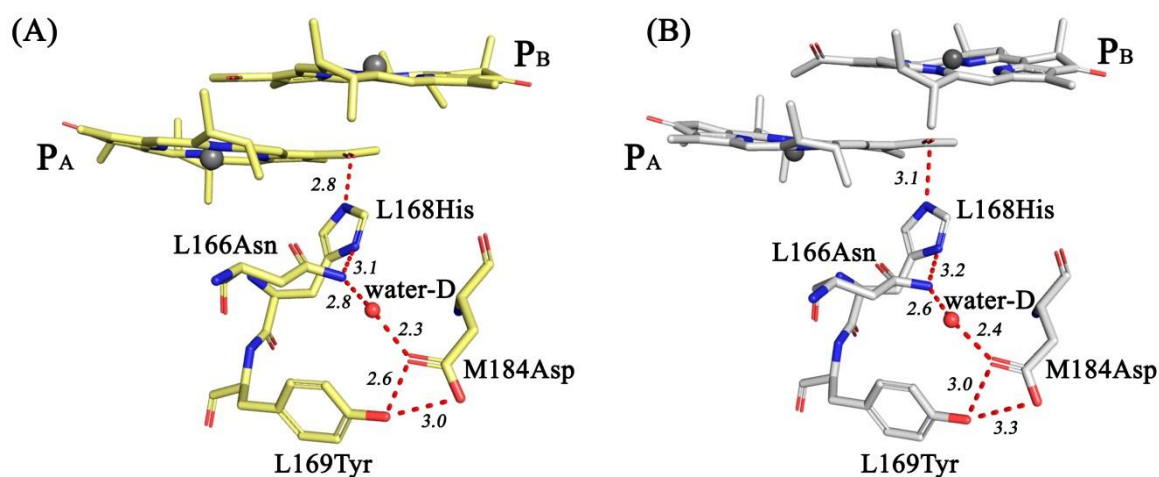

Figure S2. The hydrogen-bonding networks in the proximity of the His L168 in the wild-type RC (A) and the RC I(L177)H + F(M197)H (B). All distances are shown in Å.
